# Supplementary material for: The Dual Effect of Rho-Kinase Inhibition on Trabecular Meshwork Cells Cytoskeleton and Extracellular Matrix in an In Vitro Model of Glaucoma
Source: MDPI journal article supplement (doi:10.3390/jcm11041001), 2022-02-15
Supplement: s1 [file s1]

## Supplementary Materials:

**Table S1.** HTMC lines information P: passage, IF: immunofluorescence, WB: Western blot.

| HTMC line number | Age of the donor (years) | Characterization at passage | Used in experimental set (passage)  |
|------------------|--------------------------|-----------------------------|-------------------------------------|
| 1                | 60                       | P1                          | IF (P3)                             |
| 2                | 83                       | P1                          | IF (P3)                             |
| 3                | 86                       | P1                          | IF (P4)<br>WB (P6)<br>Matrigel (P5) |
| 4                | 62                       | P3                          | IF (P4, P6)                         |
| 5                | 60                       | P3                          | WB (P6)                             |
| 6                | 51                       | P2                          | IF (P3)<br>Matrigel (P5)            |
| 7                | 50                       | P2                          | IF (P3)                             |
| 8                | 76                       | P2                          | IF (P6)<br>Matrigel (P6)            |
| 9                | 71                       | P2                          | IF (P6)<br>WB (P6)                  |
| 10               | 49                       | P4                          | WB (P5)                             |
| 11               | 74                       | P4                          | IF (P5)<br>WB (P5)<br>Matrigel (P6) |

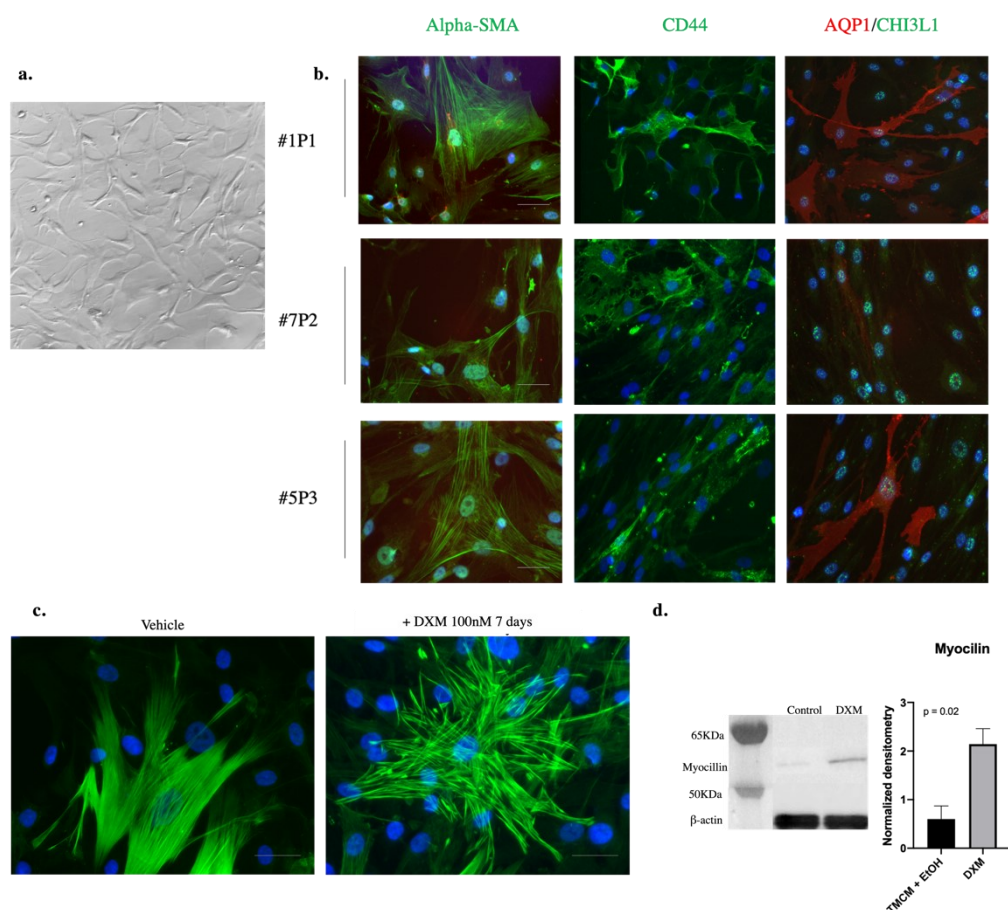

**Figure S1.** Characterization of the normal human trabecular meshwork cells a. Representative phase-contrast images of pHTMC on confluent phase (x20), TMC culture presented a cobblestone-like pattern with some overlapping processes. b. pHTMC from different donors (1 P1, 7 P2, 5 P3) were stained for markers expressed by TMC: alpha-SMA (green), CD44 (green), CHI3L1 (green), AQP1 (red) c. Immunolabeling of alpha-SMA (green), and nuclei (DAPI in blue) with or without exposure to dexamethasone (DXM, 100nM) for 7 days on pHTMC. The actin cytoskeleton is rearranged and there is an increase in the expression of alpha-SMA after exposure to dexamethasone. Magnification 200X, scale bar = 30  $\mu$ m. d. Representative western blot of myocilin and  $\beta$ -actin and the densitometry analysis of myocilin normalized to  $\beta$ -actin showing dexamethasone (DXM)-induction of myocilin.
